# Supplementary material for: Emergence of 2D high-temperature nodal-line half-metal in monolayer AgN
Source: Royal Society of Chemistry journal article supplement (doi:10.1039/d0cp04961a), 2020-01-01
Supplement: d0cp04961a1.pdf [file d0cp04961a1.pdf]

## Supporting Information:

### Emergence of 2D high-Temperature Nodal-line half-metal in AgN monolayer.

Xin-Yang Li<sup>#</sup>, Meng-Han Zhang<sup>#</sup>, Miao-Juan Ren<sup>\*</sup>, and Chang-Wen Zhang<sup>\*</sup>

School of Physics and Technology, Institute of Spintronics, University of  
Jinan, Jinan, Shandong, 250022, People's Republic of China

\* Corresponding author: [ss\\_zhangchw@ujn.edu.cn](mailto:ss_zhangchw@ujn.edu.cn)

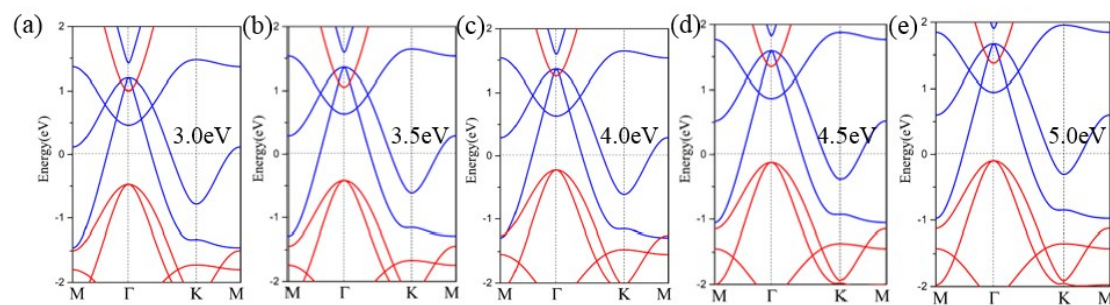

**Figure S1.** The band structure of AgN with different U values(3.0eV-5.0eV).

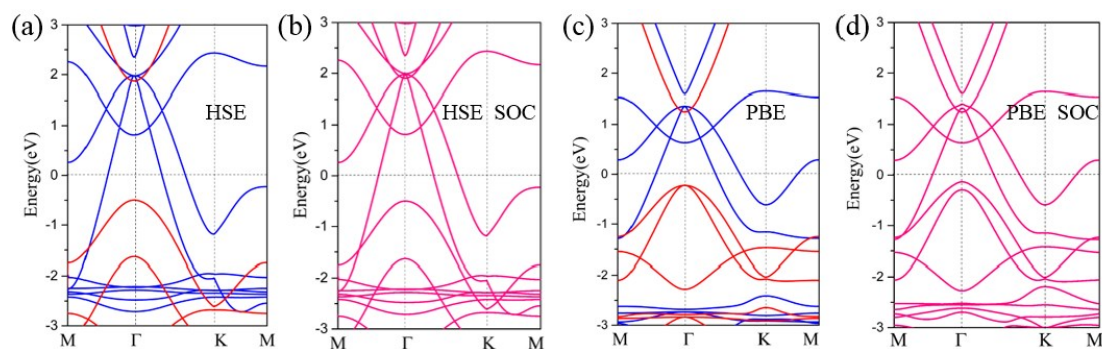

**Figure S2.** (a) and (b) HSE band structures for the AgN with and without SOC band structures. (c) and (d) PBE+U band structures for AgN with and without SOC.

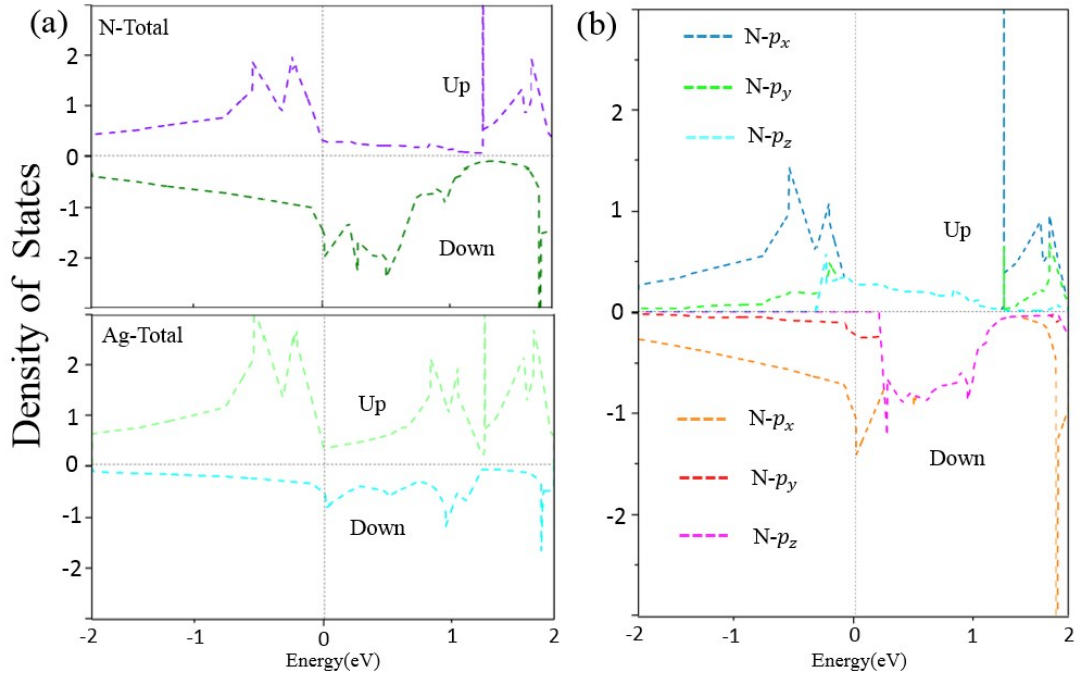

**Figure S3.** (a) The total and partial densities of states (DOSs) for AgN structure.(b) Partial DOSs without SOC of N atom.

**Table S1.** A tabulated form (PBE, PBE+SOC, HSE, HSE+SOC) of lattice parameters with and without the SOC.

| Calculation method | PBE      | PBE+SOC  | HSE      | HSE+SOC  |
|--------------------|----------|----------|----------|----------|
| Lattice constant   | 4.286(Å) | 4.287(Å) | 4.284(Å) | 4.283(Å) |
